# Supplementary material
Source: Royal Society of Chemistry journal article supplement (doi:10.1039/d6cc02030e)
Supplement: d6cc02030e1.pdf [file d6cc02030e1.pdf]

## Supporting Information

# G/T Mismatch Discrimination by positioning the mismatch site close to the catalytic core of a 10-23 DNAzyme sensor

Veronika D. Ace,<sup>[a]</sup> Daria S. Ereshko,<sup>[a]</sup> Sofiiia S. Zaplavnaya,<sup>[a]</sup> Zain Hussein,<sup>[a]</sup> Dmitry M. Kolpashchikov,<sup>[b,c,d]</sup> Christina Patra,<sup>\*[a]</sup> Ahmed A. Eldeeb<sup>\*[e,f]</sup>

---

*\* Corresponding authors.*

<sup>a</sup> Center for Molecular and Biological Technologies, ITMO University, 9 Lomonosova Str., 191002 St. Petersburg, Russian Federation

<sup>b</sup> Chemistry Department, University of Central Florida, 4000 Central Florida Blvd., Orlando, FL 32816, USA.

<sup>c</sup> Burnett School of Biomedical Sciences, University of Central Florida, Orlando, Florida, USA.

<sup>d</sup> National Center for Forensic Science, University of Central Florida, Orlando, FL, USA

<sup>e</sup> Nucleic acid nanotechnology laboratory, ITMO University, 191002, 9 Lomonosova st., Saint-Petersburg, Russian Federation

<sup>f</sup> Belozersky Institute of Physico-Chemical Biology, Lomonosov Moscow State University 119992, 1/40 Leninskiye Gory, Moscow, Russian Federation

## Contents

|                                                                                            |    |
|--------------------------------------------------------------------------------------------|----|
| Methods and Materials .....                                                                | 3  |
| Oligonucleotides used in this study .....                                                  | 4  |
| $\Delta\Delta G$ between fully mitched miR17 and mismatched miR20 and the biDz sensor..... | 6  |
| DNM assembly assessment.....                                                               | 6  |
| Multiple turnover experiment over time .....                                               | 7  |
| Limit of Detection.....                                                                    | 8  |
| Impact of a higher concentration of Magnesium on specificity.....                          | 9  |
| References .....                                                                           | 10 |

## Methods and Materials

**Assembling of DNM.** To perform annealing, machine parts T1m and T2m (DNMm) or T1c and T2c (DNMc) were added in equal amounts (Table S5) to a reaction buffer consisting of 50 mM HEPES (pH 7.4) (Helicon, Russia), 150 mM KCl (LenReactiv, Russia), 15 mM NaCl (LenReactiv, Russia) and 50 mM MgCl<sub>2</sub> (LenReactiv, Russia) for DNMm and DNMc. The resulting solution was then placed into a beaker containing 500 mL preboiled water. The temperature was then gradually decreased overnight until it reached room temperature. Annealing efficiency was tested using native gel electrophoresis.

**Native polyacrylamide gel electrophoresis.** Native 10% polyacrylamide gel was prepared according to the following tables, for the evaluation of DNMm and DNMc assembly. Electrophoresis proceeded at 80 V for a duration of 120 min. Following electrophoresis, the gel underwent incubation in GelRed (Biotium, USA) solution. Visualization and analysis were performed utilizing the GelDoc Go and Image Lab (Bio-Rad, USA) gel visualization system.

**Fluorescence assay.** In this experiment, synthetic DNA analyte at concentration of 1 nM was incubated in the 50mM MgCl<sub>2</sub> containing reaction buffer (Table S2) in the presence of 200 nM F-sub, 20 nM of the free arm and 5 nM of the annealed DNMm or DNMc, respectively (Table S5). The experiment was incubated in a waterbath at 45°C for 3 h. Once the incubation was over sample fluorescence was measured using excitation/emission wavelengths of 480/525 nm on Spark fluorescent plate reader (Tecan, Switzerland). Controls in the absence of a cleaving agent and/or analyte molecule were added in all experiments.

**Kinetics of Fsub cleavage.** In this experiment, synthetic DNA analyte at concentration of 1 nM was incubated in the 50mM MgCl<sub>2</sub> containing reaction buffer (Table S2) in the presence of 200 nM F-sub, 20 nM of the free arm and 5 nM of the annealed DNMm or DNMc, respectively (Table S5). The experiment was incubated in a waterbath at 45°C for 3 h. At the following time points – 0, 5, 10, 20, 40, 60, 90, 120, 150, and 180 min – each sample was vortexed and 50mkl of the reaction solution were taken for fluorescence measurement using excitation/emission wavelengths of 480/525 nm on Spark fluorescent plate reader (Tecan, Switzerland). Controls in the absence of a cleaving agent and/or analyte molecule were added in all experiments.

**Limit of Detection.** To evaluate the limit of detection (LOD) for both DNMm and DNMc, a series of KRAS-A analyte concentrations ranging from 0.5 pM to 1000 pM was tested. All samples were incubated in the 50mM MgCl<sub>2</sub> containing reaction buffer (Table S2) in the

presence of 200 nM F-sub, 20 nM of the free arm and 5 nM of the annealed DNMs. A control sample without analyte was also included to establish the background signal. All samples were then incubated in a water bath at 45 °C for 3 hours. Once the incubation was over sample fluorescence was measured using excitation/emission wavelengths of 480/525 nm on Spark fluorescent plate reader (Tecan, Switzerland).

**Table S1.** Constituents of the native 10% polyacrylamide gel for a single gel (10 mL).

| Reagents                  | Volume     |
|---------------------------|------------|
| TBE 10x                   | 1 mL       |
| 40% AA:BA                 | 2.5 mL     |
| 10% APS (Helicon, Russia) | 80 µL      |
| TEMED (Helicon, Russia)   | 8 µL       |
| H <sub>2</sub> O          | Till 10 mL |

**Table S2.** Reaction buffer components and their concentrations.

| Reagent                                | Concentration |
|----------------------------------------|---------------|
| MgCl <sub>2</sub> (LenReactiv, Russia) | 50 mM         |
| KCl (LenReactiv, Russia)               | 150 mM        |
| NaCl (LenReactiv, Russia)              | 15 mM         |
| HEPES pH (7.4) (Helicon, Russia)       | 50 mM         |

## Oligonucleotides used in this study

**Table S3.** List of oligonucleotides used in this study and their sequences. Oligonucleotides containing FAM, BHQ1 or HEG linker were purchased from DNAsynthesis (Moscow, Russia); the rest were purchased from Evrogen (Moscow, Russia).

| Name   | Sequences 5' -> 3'                                                      |
|--------|-------------------------------------------------------------------------|
| F-sub  | CGGT ACAT TGTA GAAG TTAA GGTT <sup>FAM</sup> TCCTC gu CCCT GGGCA -BHQ1  |
| KRAS-G | GAATATAAACTTGTGGTAGTTGGAGCTGGTGGCGTAGGCAAGAGTGCCTTGA<br>CGATACAGCTAATTC |

|          |                                                                                                                                  |
|----------|----------------------------------------------------------------------------------------------------------------------------------|
| KRAS-A   | GAATATAAACTTGTGGTAGTTGGAGCTGGTGACGTAGGCAAGAGTGCCTTGA<br>CGATACAGCTAATTC                                                          |
| DNMm     |                                                                                                                                  |
| T1m      | TAAGTTAACAGAGGCATGTTACGCATAGTCTCATAGTGTA      TTT      TTT<br><u>AGGCACTCTTGCACAACGAGAGGAAACCTT</u>                              |
| T2m      | <u>GAATTAGCTGTATCGTCA</u> TTT      TTT<br>TACTATGAGACTATGCGTAACATGCCTCTGTAACTTA      TTT      TTT<br><u>GCTCCAAC TACCACAAGTT</u> |
| Arm3m v1 | <u>TGCCCAGGGAGGCTAGCTCTACGTCACCA</u>                                                                                             |
| Arm3m v2 | <u>TGCCCAGGGAGGCTAGCTCTACGTCACCG</u>                                                                                             |
| Arm3m v3 | <u>TGCCCAGGGAGGCTAGCTCTACGTCAC TA</u>                                                                                            |
| Arm3m v4 | <u>TGCCCAGGGAGGCTAGCTCTACGTCATCA</u>                                                                                             |
| Arm3m v5 | <u>TGCCCAGGGAGGCTAGCTCTACGTCAGCA</u>                                                                                             |
| Arm3m v6 | <u>TGCCCAGGGAGGCTAGCTCTACGTCACA</u>                                                                                              |
| DNMc     |                                                                                                                                  |
| T1c      | TAAGTTAACAGAGGCATGTTACGCATAGTCTCATAGTGTA      /HEG/<br><u>CACTCTTGCCTACGACAACGAGAGGAAACCTT</u>                                   |
| T2c      | <u>TAGCTGTATCGTCAAGG</u> /HEG/<br>TACTATGAGACTATGCGTAACATGCCTCTGTAACTTA      /HEG/<br><u>TACCACAAGTTTATATTC</u>                  |
| Arm3c v1 | <u>TGCCCAGGGAGGCTAGCTTCACCAGCTCCAAC</u>                                                                                          |
| Arm3c v2 | <u>TGCCCAGGGAGGCTAGCTTCACCTGCTCCAAC</u>                                                                                          |
| Arm3c v3 | <u>TGCCCAGGGAGGCTAGCTTCATCAGCTCCAAC</u>                                                                                          |
| Arm3c v4 | <u>TGCCCAGGGAGGCTAGCTTACCAGCTCCAAC</u>                                                                                           |
| Arm3c v5 | <u>TGCCCAGGGAGGCTAGCTTCCCAGCTCCAAC</u>                                                                                           |
| Arm3c v6 | <u>TGCCCAGGGAGGCTAGCTTCGCCAGCTCCAAC</u>                                                                                          |

Bold nucleotides are the Dz 10-23 catalytic core; Underlined nucleotides are F-sub binding arms; Nucleotides in blue represent analyte-binding arms; Nucleotides in red represent the SNV site; Nucleotides in green represent the secondary mismatch site; FAM - fluorescein amidites; BHQ1 – black hole quencher 1; ribonucleotides are in lower case.

### **$\Delta\Delta G$ between fully mitched miR17 and mismatched miR20 and the biDz sensor.**

**Table S4.** Difference of the predicted free-energy between fully mitched miR17 and mismatched miR20 and the biDz sensor. IDT's OligoAnalyzer tool was used to predict  $\Delta G$ s. Parameters used: SpecSheet, DNA, [oligo] = 0.01  $\mu$ M, [Na<sup>+</sup>] = 165 mM, [Mg<sup>2+</sup>] = 50 mM, [dNTPs] = 0  $\mu$ M, Hetero-dimer.

| <i>Arm</i>         | <i><math>\Delta G</math> [kcal/mol]</i> |              | <i><math>\Delta\Delta G</math> [kcal/mol]</i> |
|--------------------|-----------------------------------------|--------------|-----------------------------------------------|
|                    | <i>miR17</i>                            | <i>miR20</i> |                                               |
| <b><i>Arm1</i></b> | -20.51                                  | -18.56       | 1.95                                          |
| <b><i>Arm2</i></b> | -18.38                                  | -16.43       | 1.95                                          |

### **DNM assembly assessment**

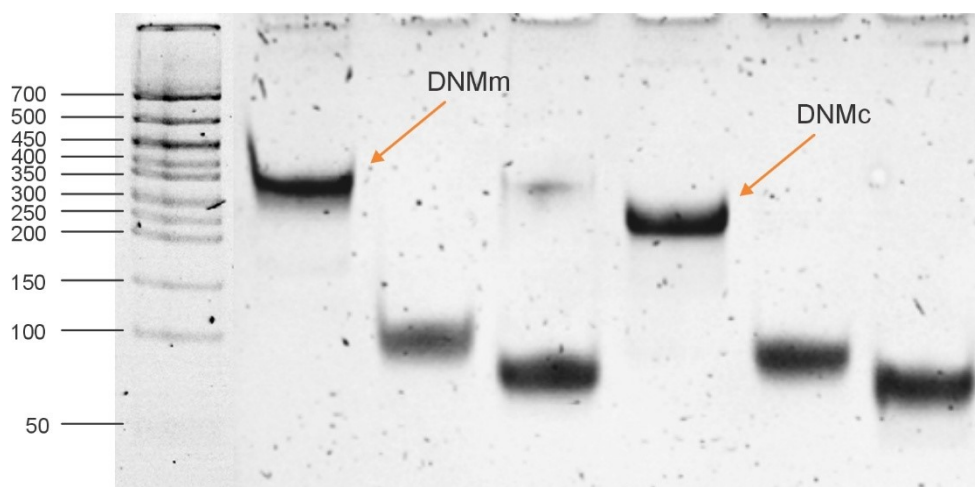

**Figure S1.** Assembly of DNMM and DNMC tested by native PAGE containing 2 mM Mg<sup>2+</sup>. Each lane respectively contains: L – 50bp+ molecular ladder (Evrogen, Russia), 2 – DNMM assembled, 3 – T2m, 4 – T1m, 5 – DNMC assembled, 6 – T2c, 7 – T1c.

## Multiple turnover experiment over time

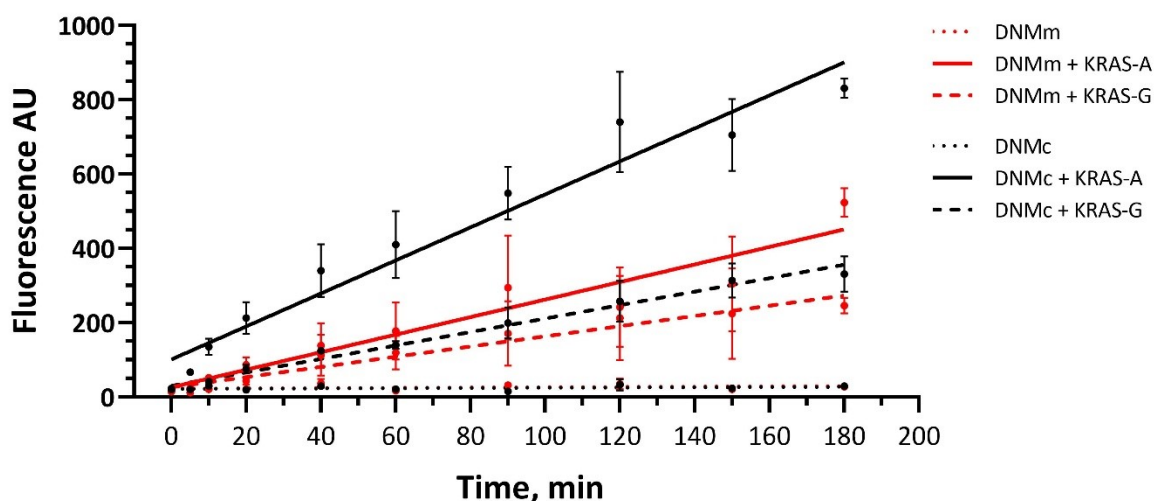

**Figure S2.** Steady-state kinetics of F-sub cleavage by both DNMM and DNMC, in complex with Arm3m v1 and Arm3c v1 respectively, and in the presence of KRAS-A and KRAS-G. The experiment was conducted under multiple-turnover conditions over 10 time points (0, 5, 10, 20, 40, 60, 90, 120, 150, and 180 min). The experiment was done in triplicates in the presence of 50mM MgCl<sub>2</sub>, incubated at 45°C. The graph represents the linear fit for each complex. The relative rate of each reaction is shown in the table below.

**Table S5.** Relative rate of F-sub cleavage in the presence of each complex indicated below.

|                                                    | <i>DNMM</i> | <i>DNMM + KRAS-A</i> | <i>DNMM + KRAS-G</i> | <i>DNMC</i> | <i>DNMC + KRAS-A</i> | <i>DNMC + KRAS-G</i> |
|----------------------------------------------------|-------------|----------------------|----------------------|-------------|----------------------|----------------------|
| <b>Relative rate</b><br><i>AU*min<sup>-1</sup></i> | 0,039       | 2,361                | 1,371                | 0,030       | 4,442                | 1,811                |

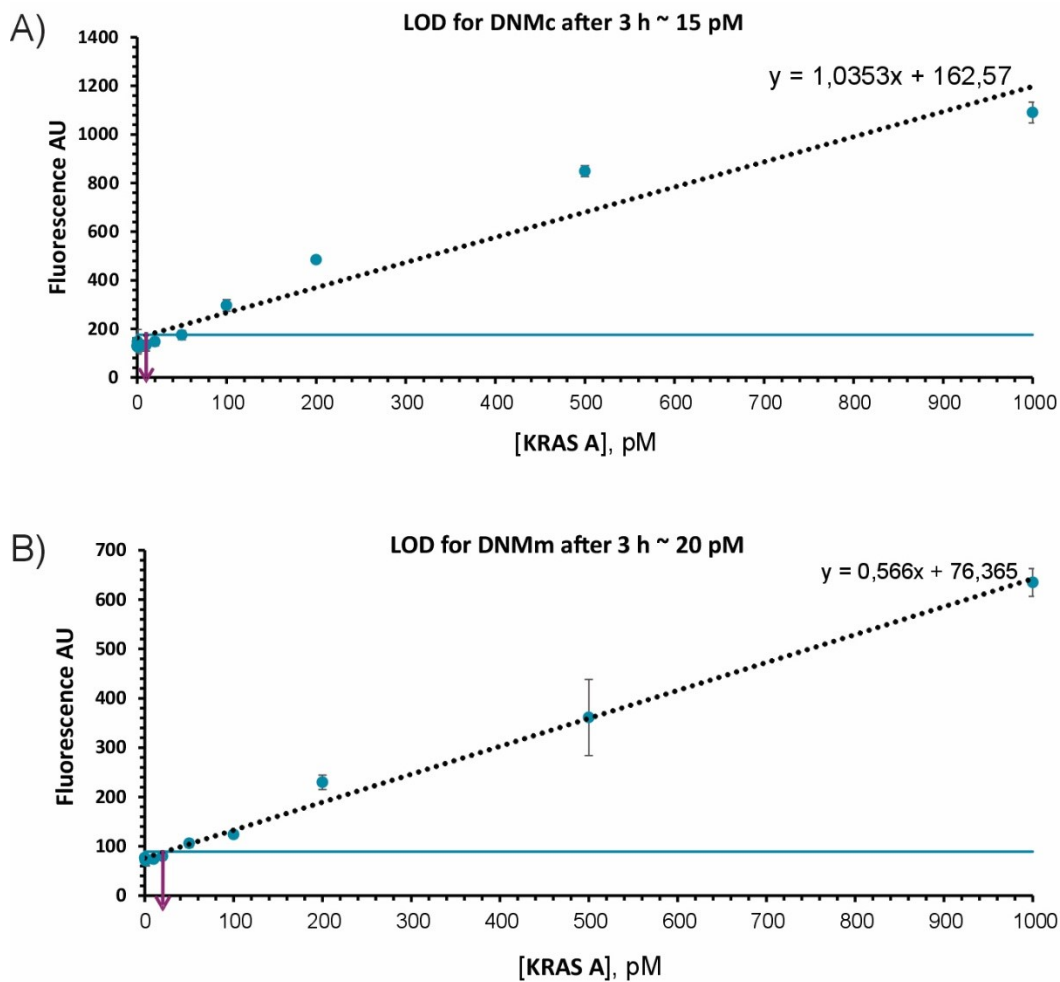

### Limit of Detection

**Figure S3.** A) Limit of detection (LOD) of KRAS-A by DNMc. A series of KRAS-A analyte concentrations ranging from 0.5 pM to 1000 pM was tested and the LOD was determined to be approximately 20 pM. B) Limit of detection (LOD) of KRAS-A by DNMc. A series of KRAS-A analyte concentrations ranging from 0.5 pM to 1000 pM was tested and the LOD was determined to be approximately 15 pM. For LOD determination, the procedure followed previously described guidelines<sup>1</sup>. First, the standard deviation ( $\sigma$ ) of the background sample was calculated. A threshold was then defined on the LOD plot as the background fluorescence of the DNA machine plus three times the standard deviation ( $y = \text{background} + 3\sigma$ , blue line). The point where this threshold intersected the calibration curve was projected onto the x-axis (purple arrow), and this value was taken as the LOD.

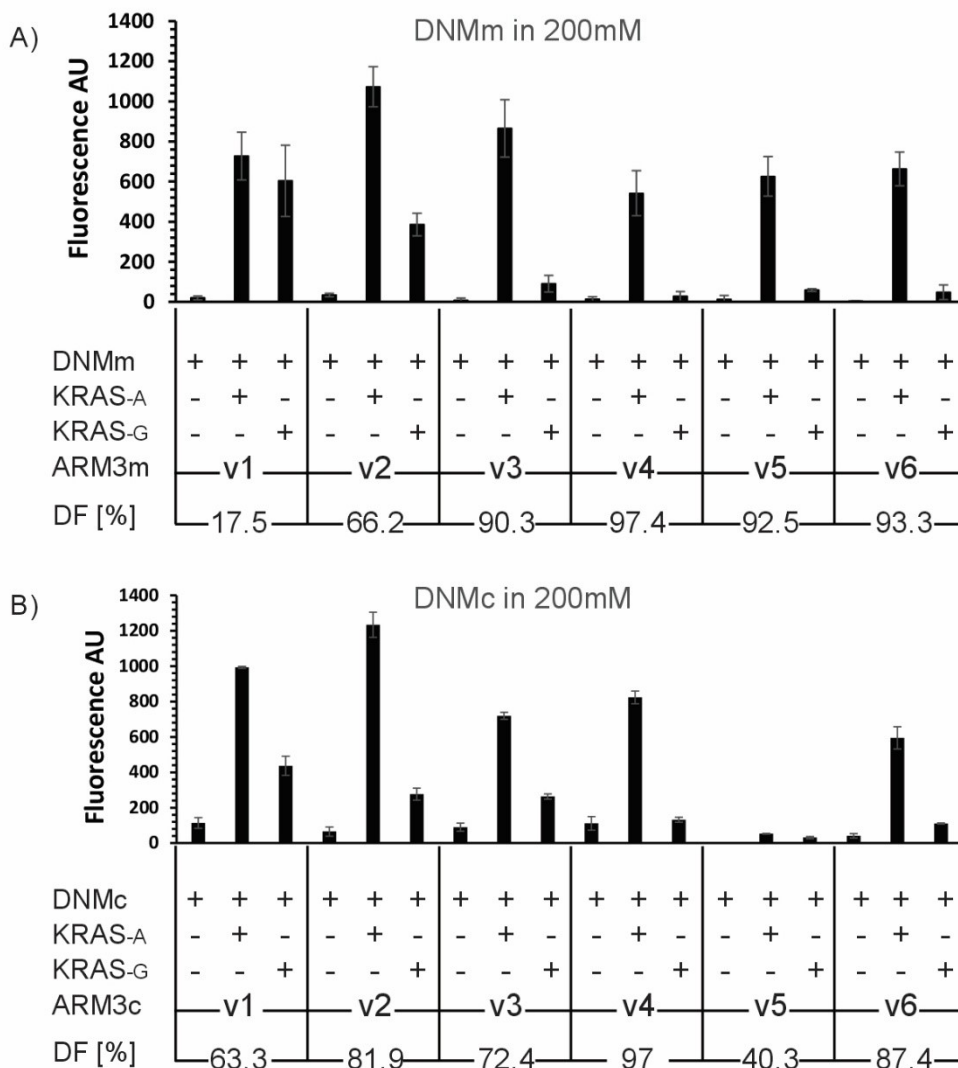

### Impact of a higher concentration of Magnesium on specificity

**Figure S4.** Comparison between DNMM and DNMc G→A differentiation power in the presence of 200 mM MgCl<sub>2</sub>. Higher concentration of MgCl<sub>2</sub> increases the activity of the complexes in the presence of both fully matched and mismatched analytes, reducing specificity in comparison with 50 mM MgCl<sub>2</sub> concentration. Overall, the specificity trend among all arm seemed similar and comparable to experiment conducted in 50 mM MgCl<sub>2</sub>. A) Fluorescence assay; comparison between different Arm3m variants for the DNMM. DNMM v1 shows a DF of 17.5%. Arm3m v4 and Arm3m v6 still display the highest and second highest specificities among all variants. All samples were incubated for 3 h at 45°C. B) Fluorescence assay; comparison between different free Arm variants for the DNMc. DNMc v1 is more than three times more specific than DNMM v1, with a DF of 63.3%. Arm3c v6 in the presence of

200 mM MgCl<sub>2</sub> displays a similar behavior as Arm3m v6 in the presence of 50 mM MgCl<sub>2</sub>, by showing increased activity and specificity in comparison with Arm 3c v5, which incorporated the secondary mismatch in the same position. Interestingly, in this case too, the G/T mismatch of Arm3c v6 is known to stabilize the complex in the CGC/GTG triplet context.<sup>2</sup> The C/T mismatch of Arm3c v5 on the hand is significantly destabilizing, which can explain the near activity of the complex even at 200 mM MgCl<sub>2</sub>. All samples were incubated for 3 h at 45°C.

## References

- 1 Daniel. MacDougall, W. B. Crummett and . et al., *Anal. Chem.*, 1980, **52**, 2242–2249.
- 2 J. S. Jr and D. Hicks, *Annual Review of Biophysics*, 2004, **33**, 415–440.
